# Supplementary material
Source: Copernicus journal article supplement (doi:10.5194/acp-26-5169-2026)
Supplement: Supplementary file 1 [file acp-26-5169-2026-supplement.pdf]

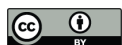

*Supplement of*

## **Distinct drivers of recent seasonal precipitation increase over Central Asia: roles of anthropogenic aerosols and greenhouse gases**

**Jianing Guo et al.**

*Correspondence to:* Xiaoning Xie (xnxie@ieecas.cn)

The copyright of individual parts of the supplement might differ from the article licence.

**This PDF file includes:**

Tables S1 to S3

Figures. S1 to S13

References

**Table S1. Detailed information on the PDRMIP models used in this study. Table adapted from Myhre et al. (2017)**

| Model           | Version | Resolution                | Ocean setup   | Baseline  | Aerosol emissions    | Aerosol processes                                                                                |
|-----------------|---------|---------------------------|---------------|-----------|----------------------|--------------------------------------------------------------------------------------------------|
| CanESM2         | 2010    | 2.8° × 2.8°, 35 levels    | Coupled ocean | Year 2000 | Emissions            | Full microphysics for aerosol-cloud interactions                                                 |
| GISS-E2-R       | E2-R    | 2° × 2.5°, 40 levels      | Coupled ocean | Year 2000 | Fixed concentrations | No aerosol microphysics effects                                                                  |
| HadGEM2         | 6.6.3   | 1.875° × 1.25°, 38 levels | Coupled ocean | Year 1860 | Emissions            | Full microphysics for aerosol-cloud interactions                                                 |
| HadGEM3         | 3       | 1.875° × 1.25°, 85 levels | Coupled ocean | Year 2000 | Fixed concentrations | Microphysics for aerosol-cloud interactions (not for BC and dust)                                |
| IPSL-CM5A       | 5A      | 3.75° × 1.875°, 39 levels | Coupled ocean | Year 2000 | Fixed concentrations | Aerosol microphysics for Twomey effect included                                                  |
| MIROC-SPRINTARS | 5.9.0   | 1.4° × 1.4°, 40 levels    | Coupled ocean | Year 2000 | Emissions            | Full microphysics for aerosol-cloud interactions                                                 |
| NCAR-CESM1-CAM4 | 1.0.3   | 2.5° × 1.9°, 26 levels    | Slab ocean    | Year 2000 | Fixed concentrations | No aerosol microphysics effects                                                                  |
| NCAR-CESM1-CAM5 | 1.1.2   | 2.5° × 1.9°, 30 levels    | Coupled ocean | Year 2000 | Emissions            | Full aerosol microphysics                                                                        |
| NorESM1         | 1-M     | 2.5° × 1.9°, 26 levels    | Coupled ocean | Year 2000 | Fixed concentrations | Microphysics of aerosol-cloud interactions included through prescribed cloud condensation nuclei |

**Table S2. Simulated scenario of the PDRMIP models used in this study.**

| Simulated scenario | CanESM2 | GISS-E2-R | HadGEM2 | HadGEM3 | IPSL-CM5 A | MIROC-S PRINTAR S | NCAR-CE SM1-CAM 4 | NCAR-CE SM1-CAM 5 | NorESM1 |
|--------------------|---------|-----------|---------|---------|------------|-------------------|-------------------|-------------------|---------|
| CO <sub>2</sub> x2 | √       | √         | √       | √       | √          | √                 | √                 | √                 | √       |
| CH <sub>4</sub> x3 | √       | √         | √       | √       | √          | √                 | √                 | √                 | √       |
| Solar+2%           | √       | √         | √       | √       | √          | √                 | √                 | √                 | √       |
| Sulx10Asia         |         | √         |         | √       | √          | √                 | √                 | √                 | √       |
| BCx10Asia          |         | √         |         | √       | √          | √                 |                   | √                 | √       |

\* Ticks indicate the models used in the different simulation scenarios.

**Table S3. Information of the DAMIP and ScenarioMIP models in CMIP6 employed in this study.**

| Model           | Institution/Country    | Resolution<br>(Longitude<br>× Latitude) | DAMIP models |          |          |          | ScenarioMIP<br>models |
|-----------------|------------------------|-----------------------------------------|--------------|----------|----------|----------|-----------------------|
|                 |                        |                                         | historical   | hist-GHG | hist-aer | hist-nat |                       |
| ACCESS-CM2      | CSIRO/Australian       | 192 × 144                               | √            | √        | √        | √        | √                     |
| ACCESS-ESM1-5   | CSIRO/Australian       | 192 × 145                               | √(40)        | √        | √        | √        | √(40)                 |
| BCC-CSM2-MR     | BCC/China              | 320 × 160                               | √            | √        | √        | √        |                       |
| CanESM5         | CCCma/Canada           | 128 × 64                                | √            | √        | √        | √        | √(25)                 |
| CESM2           | NCAR/USA               | 288 × 192                               | √            | √        | √        | √        | √                     |
| CMCC-CM2-SR5    | CMCC/Italia            | 288 × 192                               | √            |          |          |          |                       |
| CNRM-CM6-1      | CNRM-CERFACS/France    | 256 × 128                               | √            | √        | √        | √        | √                     |
| CNRM-ESM2-1     | CNRM-CERFACS/France    | 256 × 128                               |              |          |          |          | √                     |
| E3SM-2-0        | LLNL/USA               | 360 × 180                               | √            | √        | √        | √        |                       |
| EC-Earth3       | EC-Earth-Consortium/EU | 512 × 256                               | √            |          |          |          | √                     |
| FGOALS-g3       | CAS/China              | 180 × 80                                | √            |          |          |          |                       |
| GFDL-ESM4       | NOAA-GFDL/USA          | 288 × 180                               | √            | √        | √        | √        | √                     |
| GISS-E2-1-G     | GISS/USA               | 144 × 90                                | √            |          |          |          |                       |
| HadGEM3-GC31-LL | MOHC/UK                | 192 × 144                               | √            | √        | √        | √        |                       |
| INM-CM5-0       | INM/Russia             | 180 × 120                               | √            |          |          |          | √                     |
| IPSL-CM6A-LR    | IPSL/France            | 144 × 143                               | √            | √        | √        | √        | √                     |
| MIROC6          | MIROC/Japan            | 256 × 128                               | √(50)        | √        | √        | √        | √(50)                 |
| MPI-ESM1-2-HR   | MPI-M/Germany          | 384 × 192                               |              |          |          |          | √                     |
| MPI-ESM1-2-LR   | MPI-M/Germany          | 192 × 96                                |              |          |          |          | √(30)                 |
| MRI-ESM2-0      | MRI/Japan              | 320 × 160                               | √            | √        | √        | √        |                       |
| NorESM2-MM      | NCC/Norway             | 288 × 192                               | √            |          |          |          | √                     |
| UKESM1-0-LL     | MOHC/UK                | 192 × 144                               |              |          |          |          | √                     |

\* The number in the bracket represents the ensemble members used in this study. All the other models used a single member. Ticks indicate the models used in the different analyses. Note that the NorESM2-MM is a different version compared to NorESM1 used in PDRMIP (Seland et al., 2020).

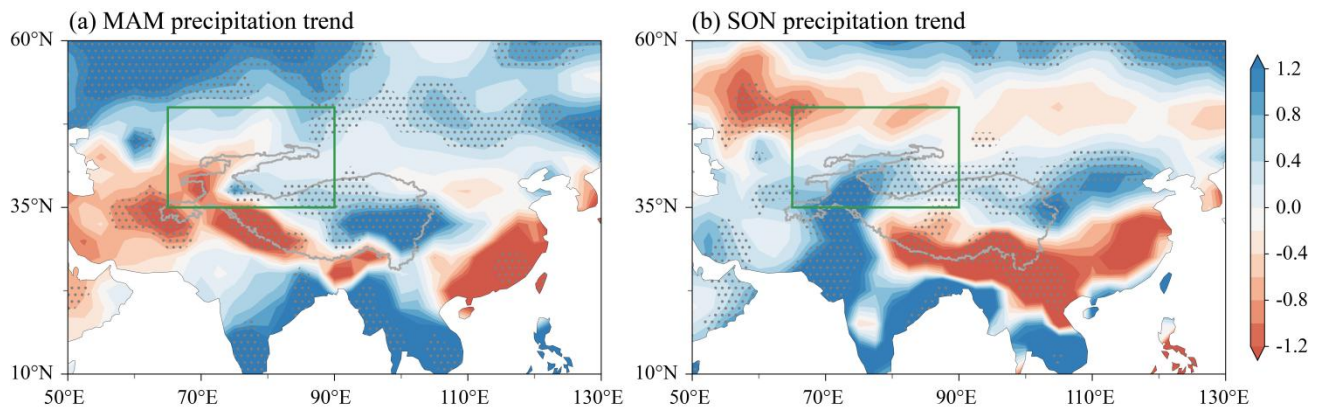

**Figure S1.** Spatial distributions of precipitation trends over Central Asia. **(a)** Spring (March–May, MAM) and **(b)** autumn (September–November, SON) precipitation trends ( $\text{mm day}^{-1}$  per 100 years) derived from GPCP during 1979–2014. The region of Central Asia ( $35^{\circ}\text{N}$ – $50^{\circ}\text{N}$ ,  $65^{\circ}\text{E}$ – $90^{\circ}\text{E}$ ) is delineated by thick green boxes. The stippling indicates trends that are statistically significant at the 90% confidence level based on a standard *t*-test. The thick gray curves denote Tibetan Plateau terrain height  $> 2500$  m.

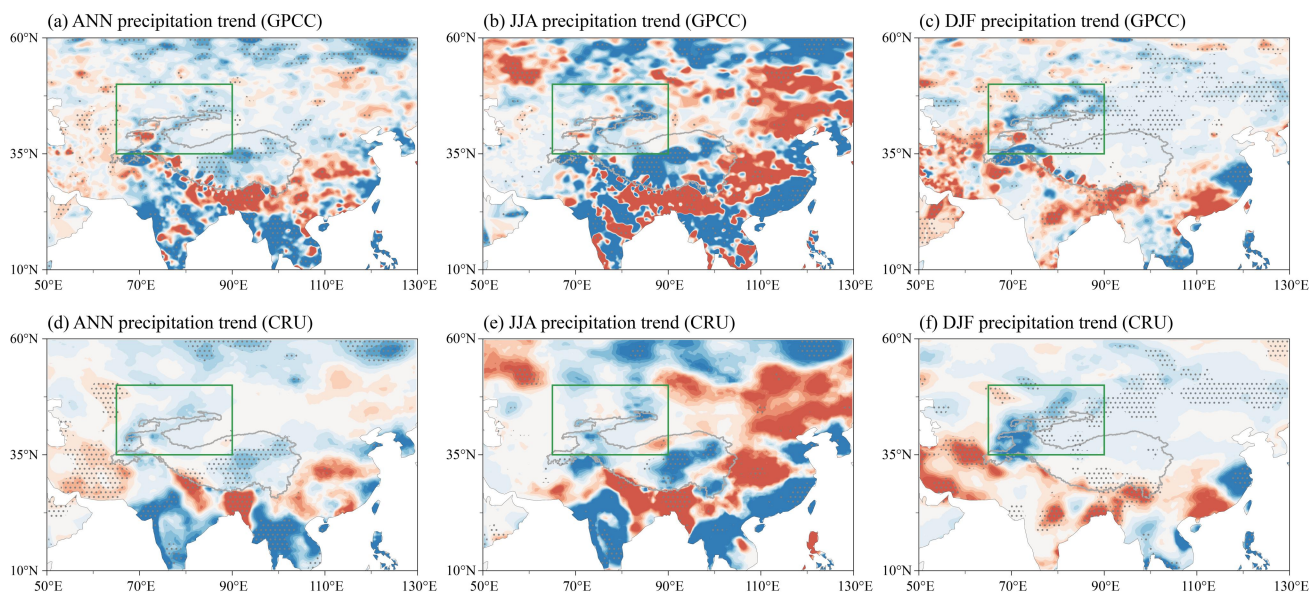

**Figure S2.** Spatial distributions of precipitation trends over Central Asia. **(a)** Annual (January–December, ANN), **(b)** summer (June–August, JJA), and **(c)** winter (December–February, DJF) precipitation trends ( $\text{mm day}^{-1}$  per 100 years) derived from GPCCC during 1979–2014. **(d–f)** Same as **(a–c)**, but derived from CRU. The region of Central Asia ( $35^{\circ}\text{N}$ – $50^{\circ}\text{N}$ ,  $65^{\circ}\text{E}$ – $90^{\circ}\text{E}$ ) is delineated by thick green boxes. The stippling indicates trends that are statistically significant at the 90% confidence level based on a standard  $t$ -test. The thick gray curves denote Tibetan Plateau terrain height  $> 2500$  m.

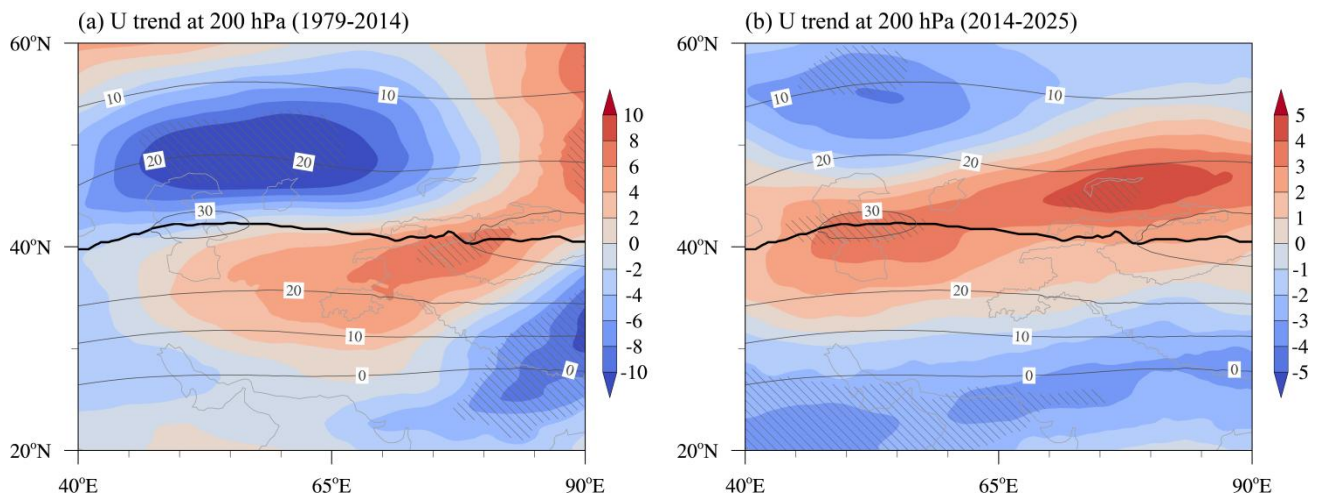

**Figure S3.** Spatial distributions of JJA zonal wind trends. **(a)** 1979–2014 ( $\text{m s}^{-1}$  per 100 years). **(b)** 2014–2025 ( $\text{m s}^{-1}$  per decade). The dark gray curves represent the climatological zonal wind and the thick black line denotes the westerly jet axis for 1979–2014. The slanted lines indicate trends that are statistically significant at the 90% confidence level based on a standard  $t$ -test.

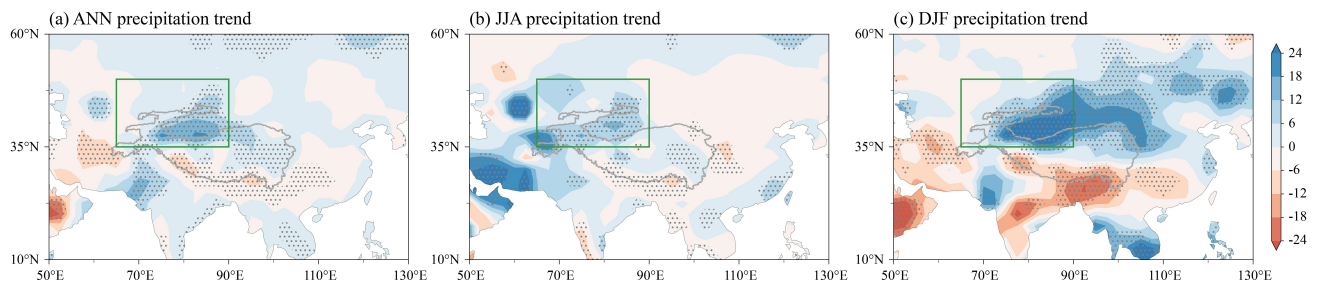

**Figure S4.** Spatial distributions of precipitation trends over Central Asia derived from GPCP. **(a)** Annual (January–December, ANN), **(b)** summer (June–August, JJA), and **(c)** winter (December–February, DJF) precipitation trends ( $\% \text{ decade}^{-1}$ ) for 1979–2014, relative to the 1979–1998 seasonal mean. The region of Central Asia ( $35^{\circ}\text{N}$ – $50^{\circ}\text{N}$ ,  $65^{\circ}\text{E}$ – $90^{\circ}\text{E}$ ) is delineated by thick green boxes. The stippling indicates trends that are statistically significant at the 90% confidence level based on a standard  $t$ -test. The thick gray curves denote Tibetan Plateau terrain height  $> 2500$  m.

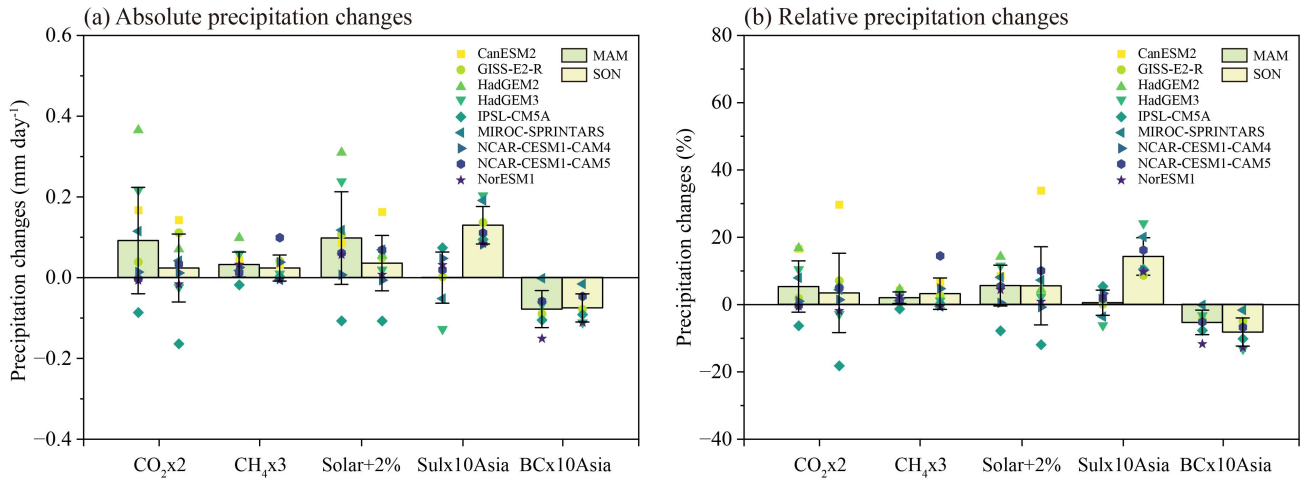

**Figure S5.** MAM and SON precipitation responses to  $\text{CO}_2 \times 2$ ,  $\text{CH}_4 \times 3$ , Solar+2%, Sulx10Asia, and BCx10Asia forcings over Central Asia in PDRMIP. **(a)** Absolute changes in precipitation ( $\text{mm day}^{-1}$ ) over Central Asia. **(b)** Relative changes in precipitation (%) over Central Asia. Error bars represent the multi-model ensemble standard deviation of PDRMIP.

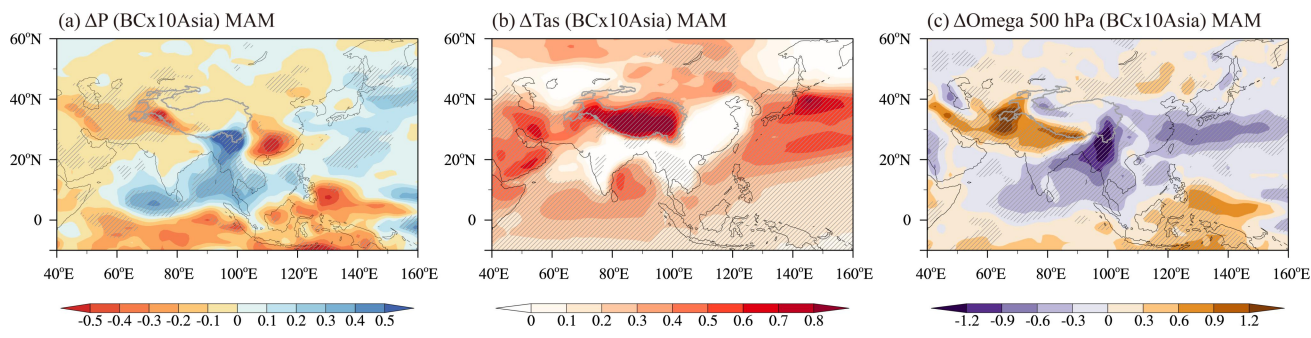

**Figure S6.** Multi-model mean anomalies during MAM induced by BCx10Asia forcing in PDRMIP. **(a)** Spatial distribution of changes in precipitation ( $\text{mm day}^{-1}$ ), **(b)** near surface temperature ( $\Delta T_{\text{as}}$ ,  $^{\circ}\text{C}$ ), and **(c)** 500 hPa vertical velocity ( $\Delta\Omega$ ,  $10^{-2} \text{ Pa s}^{-1}$ ) under BCx10Asia forcing. The slanted lines indicate where the multi-model mean of the PDRMIP models exceeds 1 standard deviation from zero. The thick gray curves denote Tibetan Plateau terrain height  $> 2500 \text{ m}$ .

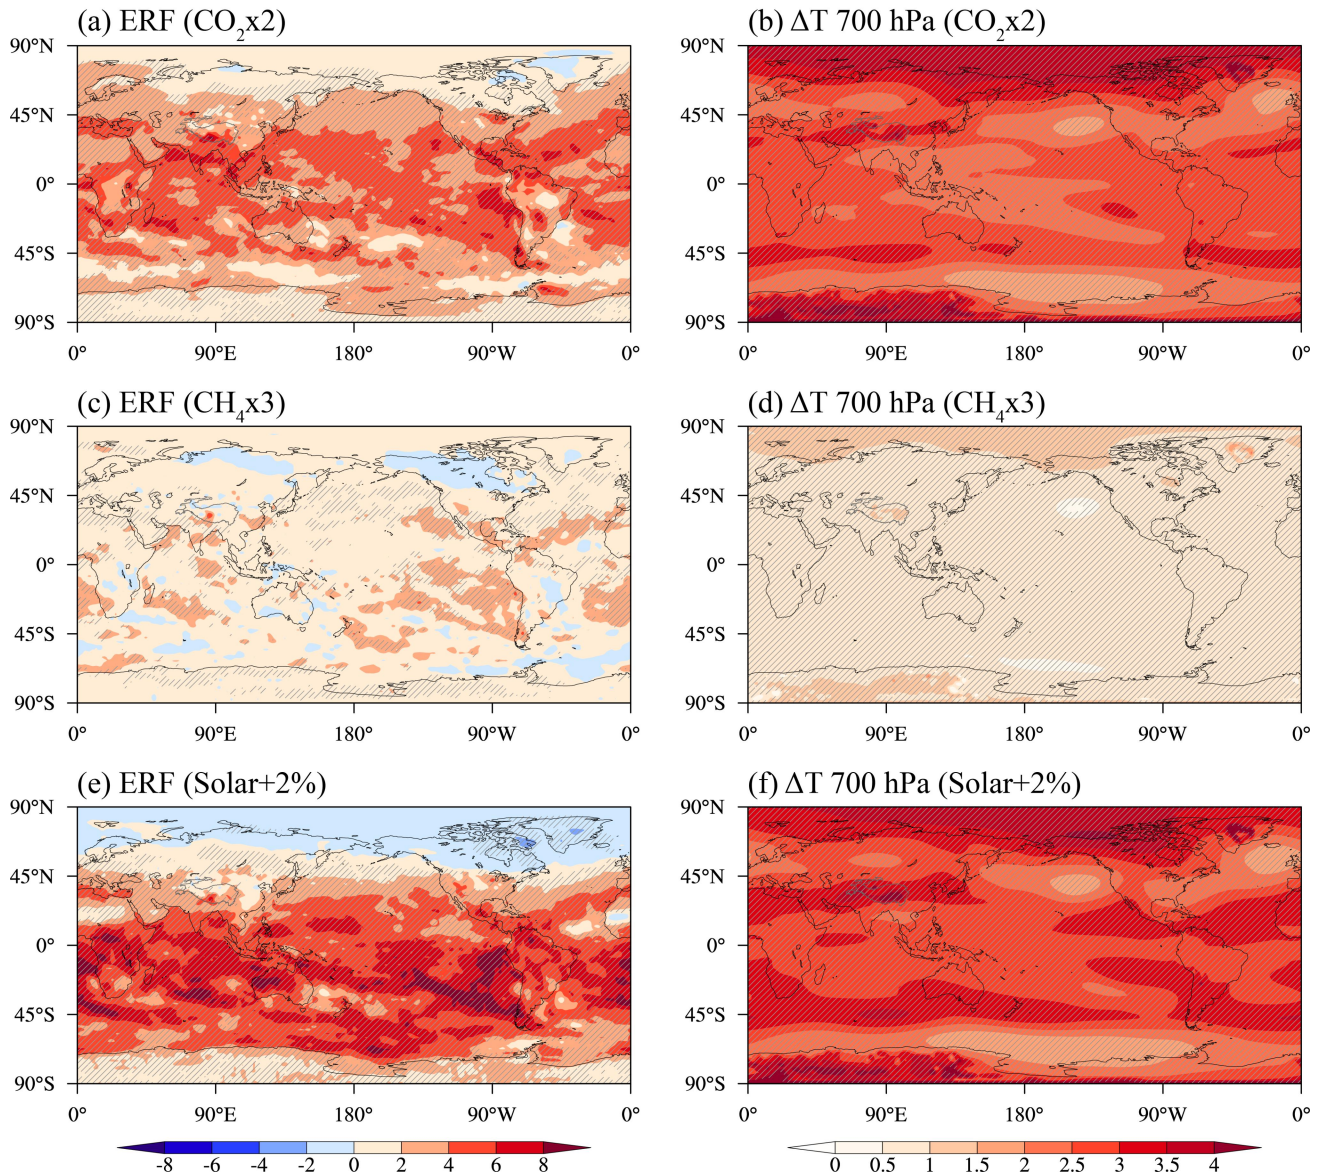

**Figure S7.** DJF effective radiative forcing and temperature changes induced by  $\text{CO}_2 \times 2$ ,  $\text{CH}_4 \times 3$ , and Solar+2% in PDRMIP. Spatial distributions of (a) effective radiative forcing (ERF,  $\text{W m}^{-2}$ ) and (b) temperature changes ( $\Delta T$ ,  $^{\circ}\text{C}$ ) at 700 hPa under  $\text{CO}_2 \times 2$  forcing. (c, d) Same as (a, b), but for  $\text{CH}_4 \times 3$  forcing. (e, f) Same as (a, b), but for Solar+2% forcing. The slanted lines indicate where the multi-model mean of the PDRMIP models exceeds 1 standard deviation from zero. The thick gray curves denote Tibetan Plateau terrain height > 2500 m.

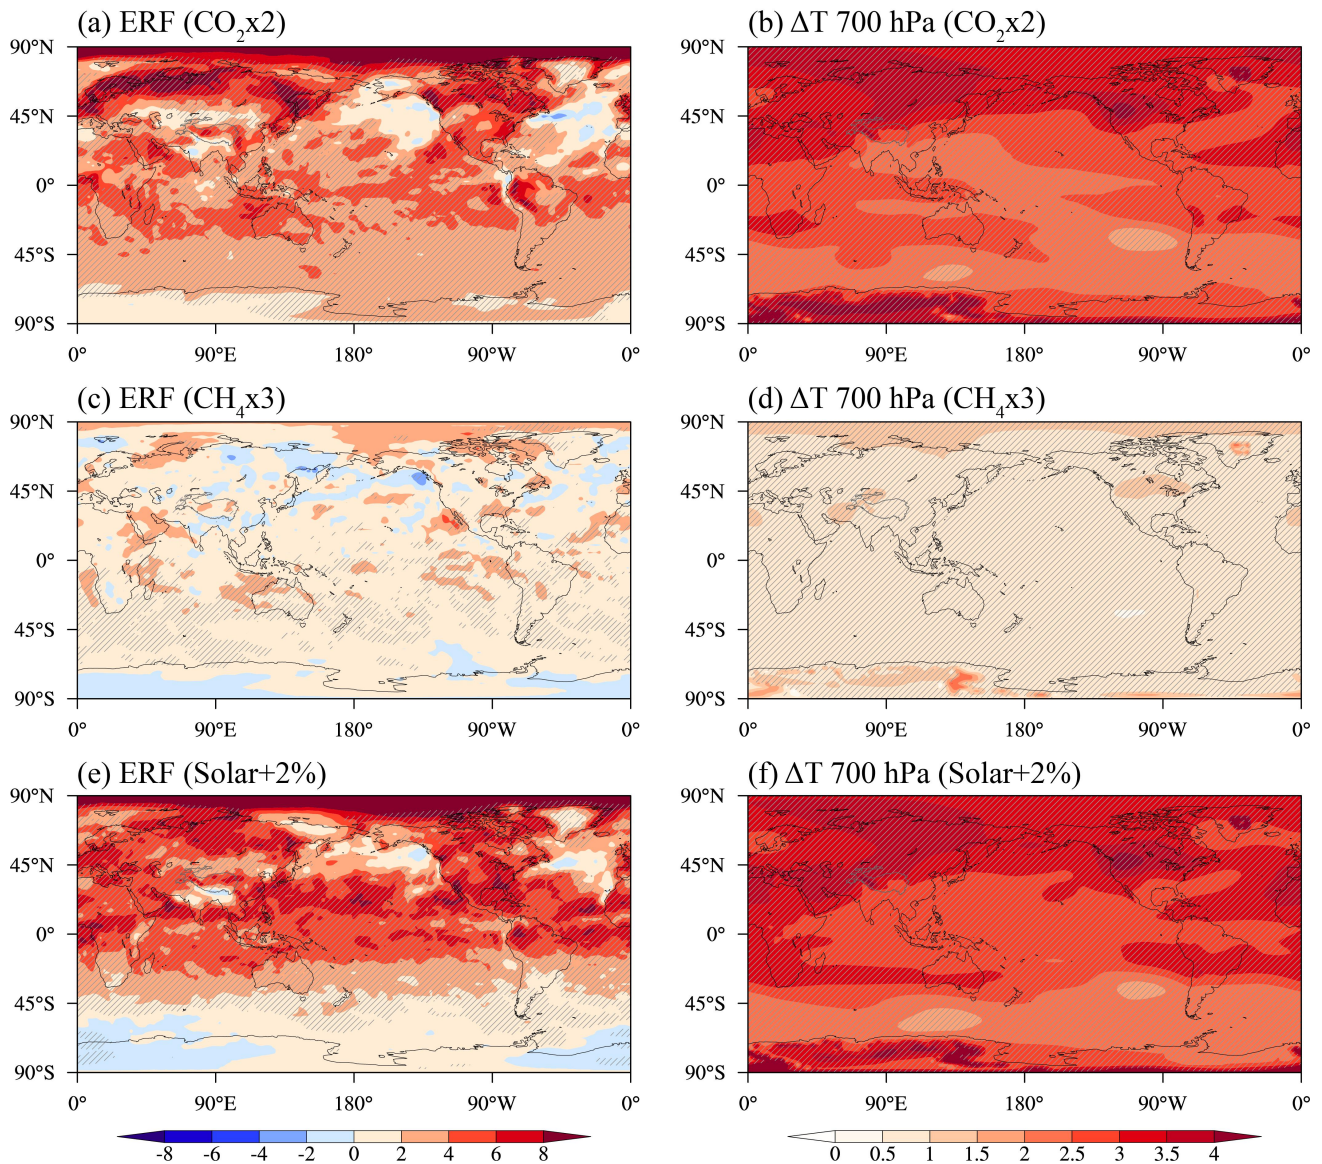

**Figure S8.** JJA effective radiative forcing and temperature changes induced by  $\text{CO}_2 \times 2$ ,  $\text{CH}_4 \times 3$ , and Solar+2% in PDRMIP. Spatial distributions of (a) effective radiative forcing (ERF,  $\text{W m}^{-2}$ ) and (b) temperature changes ( $\Delta T$ ,  $^\circ\text{C}$ ) at 700 hPa under  $\text{CO}_2 \times 2$  forcing. (c, d) Same as (a, b), but for  $\text{CH}_4 \times 3$  forcing. (e, f) Same as (a, b), but for Solar+2% forcing. The slanted lines indicate where the multi-model mean of the PDRMIP models exceeds 1 standard deviation from zero. The thick gray curves denote Tibetan Plateau terrain height  $> 2500$  m.

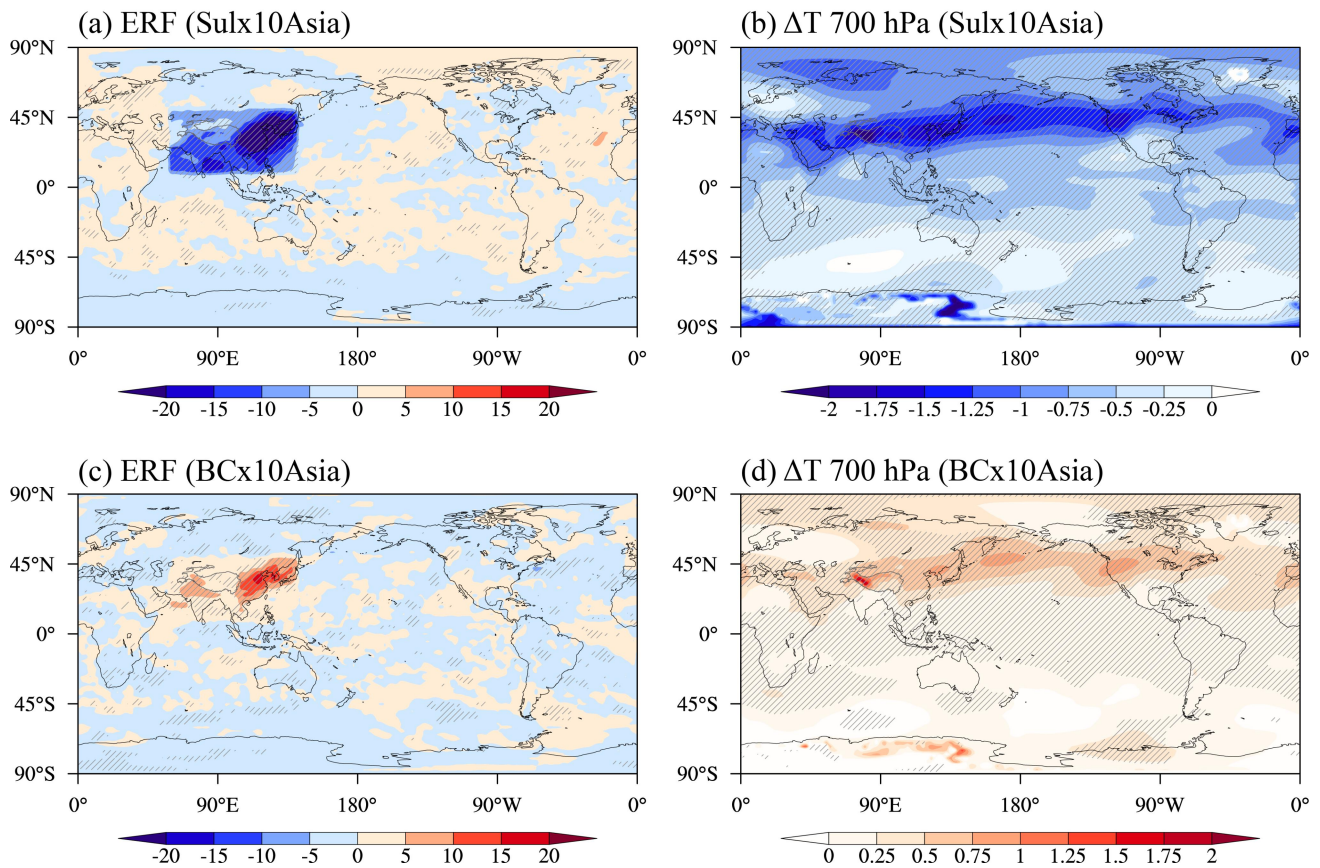

**Figure S9.** JJA effective radiative forcing and temperature changes induced by Sulx10Asia and BCx10Asia forcings in PDRMIP. Spatial distributions of (a) effective radiative forcing (ERF,  $W m^{-2}$ ) and (b) temperature changes ( $\Delta T$ ,  $^{\circ}C$ ) at 700 hPa under Sulx10Asia forcing. (c, d) Same as (a, b), but for BCx10Asia forcing. The slanted lines indicate where the multi-model mean of the PDRMIP models exceeds 1 standard deviation from zero. The thick gray curves denote Tibetan Plateau terrain height > 2500 m.

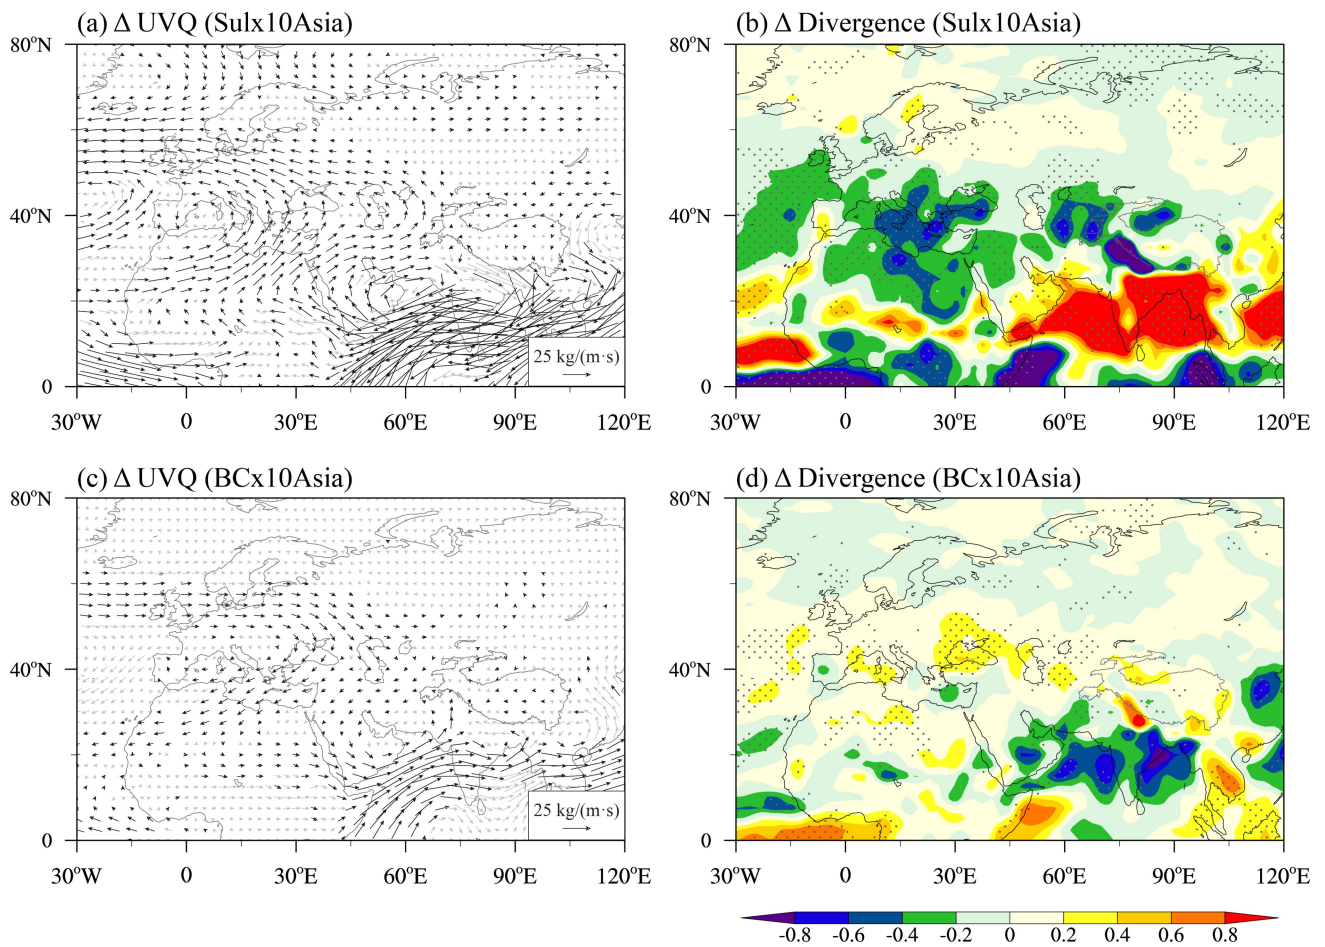

**Figure S10.** Multi-model mean JJA anomalies induced by Sulx10Asia and BCx10Asia forcings in PDRMIP. **(a)** Changes in vertically integrated (surface–300 hPa) moisture flux ( $\Delta$  UVQ,  $\text{kg m}^{-1} \text{s}^{-1}$ ) and **(b)** moisture divergence ( $\Delta$  Divergence  $10^{-5} \text{ kg m}^{-2} \text{s}^{-1}$ ) under Sulx10Asia forcing. **(c, d)** Same as **(a, b)**, but for BCx10Asia forcing. Black arrows in **(b, d)** and gray stippled regions in **(a, c)** indicate where the PDRMIP multi-model mean changes exceed 1 standard deviation from zero.

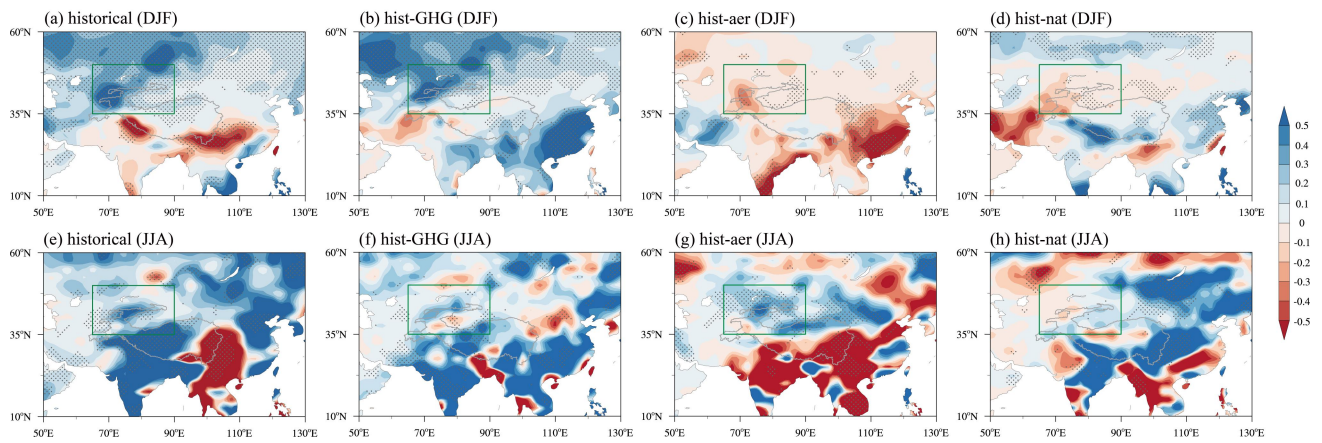

**Figure S11.** Spatial distributions of seasonal precipitation trends in DAMIP. Spatial distribution of DJF Central Asian precipitation trend ( $\text{mm day}^{-1}$  per 100 years) for (a) historical, (b) hist-GHG, (c) hist-aer, and (d) hist-nat simulations during 1979–2014. (e–h) Same as (a–d) but for JJA precipitation trends. Central Asia is outlined by thick green boxes, and gray stippling indicates regions where at least 70% of the models have the same sign of trend. Thick gray curves denote Tibetan Plateau terrain height  $> 2500$  m.

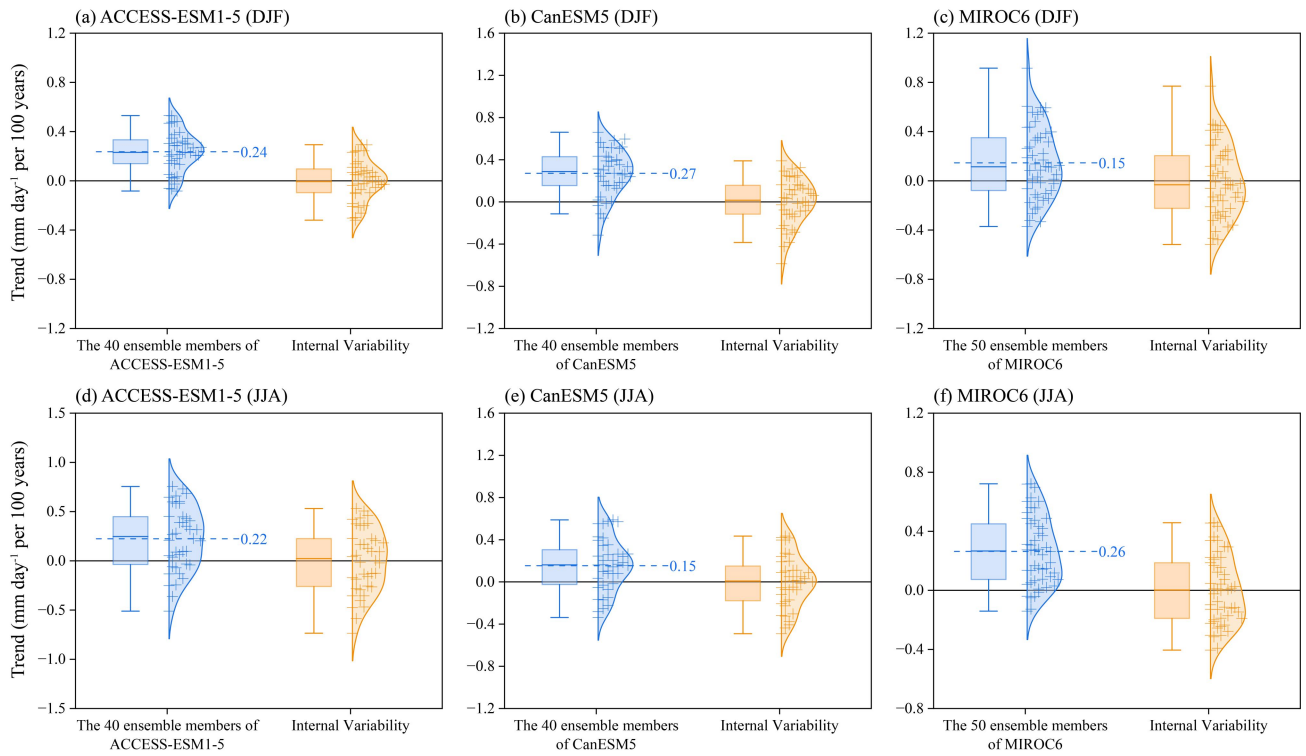

**Figure S12.** Linear trends (mm day<sup>-1</sup> per 100 years) of precipitation during 1979–2014 from large ensembles of ACCESS-ESM1-5 (40 members), CanESM5 (40 members), and MIROC6 (50 members). (a–c) DJF precipitation trends. (d–f) JJA precipitation trends. The numbers and the dotted lines indicate the ensemble mean of the precipitation trends. Boxes indicate the 25th, 50th, and 75th percentiles and the whiskers indicate the minimum and maximum values. Plus signs represent the trends in regionally averaged precipitation from individual ensemble members, and curves show kernel density estimates of the trend distribution, with the bandwidth selected using Scott’s rule.

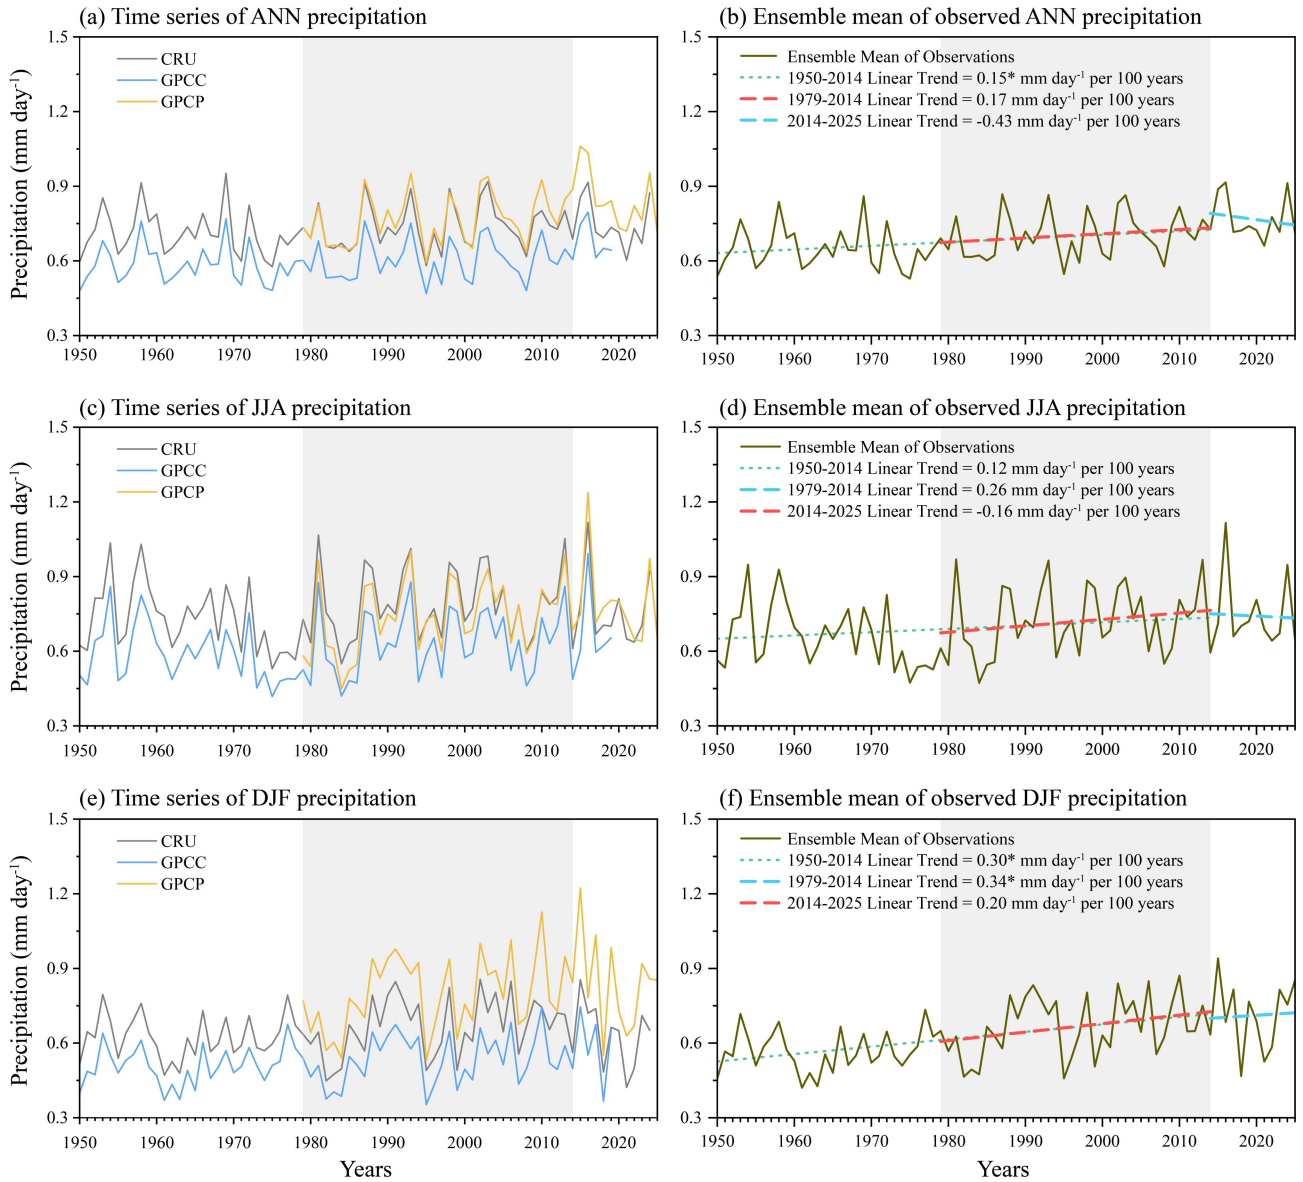

**Figure S13.** Time series of precipitation over Central Asia derived from GPCP (1979–2025), CRU (1950–2024), and GPC (1950–2019). **(a)** Annual precipitation time series from the three observational datasets. **(b)** Annual precipitation time series of the ensemble mean of the three datasets. **(c, d)** Same as **(a, b)**, but for winter precipitation. **(e, f)** Same as **(a, b)**, but for summer precipitation. The dashed lines represent the linear trend in precipitation ( $\text{mm day}^{-1}$  per 100 years).

## References

- Myhre, G., Forster, P. M., Samset, B. H., Hodnebrog, Ø., Sillmann, J., Aalbergstjø, S. G., Andrews, T., Boucher, O., Faluvegi, G., Fläschner, D., Kasoar, M., Kharin, V., Kirkevåg, A., Lamarque, J.-F., Olivié, D., Richardson, T. B., Shindell, D., Shine, K. P., Stjern, C. W., Takemura, T., Voulgarakis, A., and Zwiers, F.: PDRMIP: A precipitation driver and response model intercomparison project—Protocol and preliminary results, *Bull. Am. Meteorol. Soc.*, 98, 1185–1198, <https://doi.org/10.1175/BAMS-D-16-0019.1>, 2017.
- Seland, Ø., Bentsen, M., Olivié, D., Toniazzo, T., Gjermundsen, A., Graff, L. S., Debernard, J. B., Gupta, A. K., He, Y.-C., Kirkevåg, A., Schwinger, J., Tjiputra, J., Aas, K. S., Bethke, I., Fan, Y., Griesfeller, J., Grini, A., Guo, C., Ilicak, M., Karset, I. H. H., Landgren, O., Liakka, J., Moseid, K. O., Nummelin, A., Spensberger, C., Tang, H., Zhang, Z., Heinze, C., Iversen, T., and Schulz, M.: Overview of the Norwegian Earth System Model (NorESM2) and key climate response of CMIP6 DECK, historical, and scenario simulations, *Geosci. Model Dev.*, 13, 6165–6200, <https://doi.org/10.5194/gmd-13-6165-2020>, 2020.
